# Supplementary material for: Microwave-Hydrogen Peroxide Assisted Anaerobic Treatment as an Effective Method for Short-Chain Fatty Acids Production from Tannery Sludge
Source: MDPI journal article supplement (doi:10.3390/pr10112167), 2022-10-23
Supplement: s1 [file s1]

## **Supplementary File**

### **Microwave-hydrogen peroxide assisted anaerobic treatment as an effective method for short-chain fatty acids production from tannery sludge**

Giulia Adele Tuci, Francesco Valentino, Edoardo Bonato, Paolo Pavan, Marco Gottardo\*

Department of Environmental Science, Informatics and Statistics, Ca' Foscari University of Venice,  
Mestre-Venice, 30172, Italy

\*Corresponding author email: [marco.gottardo@unive.it](mailto:marco.gottardo@unive.it)

Table S1. Summary of the main results (average data) obtained in the mesophilic (M8, M12, M8-P) anaerobic fermentation of tannery sludge.

| Parameter                       | Unit                                   | Series M8 |        |        |         | Series M12 |        |        |         | Series M8-P |        |        |         |
|---------------------------------|----------------------------------------|-----------|--------|--------|---------|------------|--------|--------|---------|-------------|--------|--------|---------|
|                                 |                                        | pH 5.0    | pH 7.0 | pH 9.0 | pH 11.0 | pH 5.0     | pH 7.0 | pH 9.0 | pH 11.0 | pH 5.0      | pH 7.0 | pH 9.0 | pH 11.0 |
| SCFAs                           | g COD/L                                | 9.49      | 9.35   | 9.59   | 10.3    | 14.7       | 14.6   | 15.5   | 15.8    | 17.3        | 16.8   | 17.1   | 17.7    |
| SCFAs/COD <sub>SOL</sub>        | COD/COD                                | 0.72      | 0.72   | 0.74   | 0.70    | 0.74       | 0.72   | 0.73   | 0.75    | 0.75        | 0.70   | 0.76   | 0.73    |
| Y <sub>F</sub>                  | gCOD <sub>SCFA</sub> /gVS <sub>0</sub> | 0.16      | 0.16   | 0.17   | 0.17    | 0.17       | 0.17   | 0.18   | 0.18    | 0.29        | 0.28   | 0.29   | 0.30    |
| Acetic acid                     | g COD/L                                | 4.73      | 4.73   | 4.52   | 4.23    | 6.22       | 6.13   | 6.78   | 6.05    | 9.06        | 7.95   | 9.86   | 8.51    |
| Propionic acid                  | g COD/L                                | 1.33      | 1.25   | 1.07   | 1.21    | 1.79       | 2.08   | 2.18   | 2.18    | 1.88        | 2.00   | 1.28   | 1.81    |
| Isobutyric acid                 | g COD/L                                | 0.57      | 0.88   | 0.82   | 0.71    | 0.99       | 0.99   | 1.04   | 1.14    | 0.93        | 1.00   | 0.99   | 1.09    |
| Butyric acid                    | g COD/L                                | 1.71      | 1.38   | 1.87   | 2.23    | 3.59       | 2.93   | 3.23   | 3.40    | 3.36        | 3.39   | 3.09   | 4.30    |
| Isovaleric acid                 | g COD/L                                | 0.50      | 0.89   | 1.00   | 1.48    | 1.94       | 2.02   | 2.11   | 2.15    | 1.83        | 1.91   | 1.81   | 1.81    |
| Valeric acid                    | g COD/L                                | 0.65      | 0.21   | 0.33   | 0.35    | 0.21       | 0.5    | 0.18   | 0.89    | 0.25        | 0.17   | 0.17   | 0.21    |
| COD <sub>SOL</sub>              | g COD/L                                | 13.1      | 13.0   | 12.5   | 14.7    | 19.9       | 20.3   | 21.3   | 21.2    | 23.0        | 23.8   | 22.6   | 24.4    |
| Alkalinity                      | g CaCO <sub>3</sub> /L                 | 2.50      | 2.48   | 2.54   | 2.50    | 2.49       | 2.46   | 2.46   | 2.52    | 2.58        | 2.63   | 2.64   | 2.63    |
| N-NH <sub>4</sub> <sup>+</sup>  | mg/L                                   | 770       | 785    | 776    | 795     | 1132       | 1204   | 1167   | 1221    | 1620        | 1610   | 1638   | 1550    |
| P-PO <sub>4</sub> <sup>3-</sup> | mg/L                                   | 0.93      | 1.17   | 0.99   | 1.56    | 1.77       | 2.34   | 1.88   | 2.02    | 2.62        | 2.55   | 2.16   | 2.26    |
| Chromium VI                     | mg/L                                   | < 0.03    | < 0.03 | < 0.03 | < 0.03  | < 0.03     | < 0.03 | < 0.03 | < 0.03  | < 0.03      | < 0.03 | < 0.03 | < 0.03  |

Table S2. Summary of the main results (average data) obtained in the thermophilic (T8, T12, T8-P) anaerobic fermentation of tannery sludge.

| Parameter                       | Unit                                   | Series T8 |        |        |         | Series T12 |        |        |         | Series T8-P |        |        |         |
|---------------------------------|----------------------------------------|-----------|--------|--------|---------|------------|--------|--------|---------|-------------|--------|--------|---------|
|                                 |                                        | pH 5.0    | pH 7.0 | pH 9.0 | pH 11.0 | pH 5.0     | pH 7.0 | pH 9.0 | pH 11.0 | pH 5.0      | pH 7.0 | pH 9.0 | pH 11.0 |
| SCFAs                           | g COD/L                                | 7.15      | 7.19   | 7.34   | 7.26    | 15.35      | 14.84  | 13.92  | 14.97   | 23.76       | 26.20  | 26.09  | 25.74   |
| SCFAs/COD <sub>SOL</sub>        | COD/COD                                | 0.58      | 0.57   | 0.55   | 0.57    | 0.64       | 0.65   | 0.60   | 0.62    | 0.71        | 0.74   | 0.73   | 0.75    |
| Y <sub>F</sub>                  | gCOD <sub>SCFA</sub> /gVS <sub>0</sub> | 0.12      | 0.12   | 0.12   | 0.12    | 0.17       | 0.17   | 0.16   | 0.17    | 0.28        | 0.31   | 0.30   | 0.29    |
| Acetic acid                     | g COD/L                                | 2.91      | 2.80   | 2.41   | 2.45    | 5.90       | 5.89   | 5.48   | 5.74    | 12.25       | 10.34  | 10.86  | 10.46   |
| Propionic acid                  | g COD/L                                | 1.06      | 1.09   | 1.06   | 1.04    | 2.02       | 2.15   | 2.46   | 2.02    | 3.38        | 4.30   | 4.01   | 3.45    |
| Isobutyric acid                 | g COD/L                                | 0.49      | 0.52   | 0.60   | 0.55    | 1.22       | 1.14   | 1.07   | 1.15    | 1.34        | 1.98   | 2.05   | 1.59    |
| Butyric acid                    | g COD/L                                | 1.73      | 1.71   | 2.01   | 2.10    | 3.90       | 3.48   | 2.92   | 3.96    | 4.23        | 6.34   | 5.65   | 6.97    |
| Isovaleric acid                 | g COD/L                                | 0.95      | 1.08   | 1.26   | 1.13    | 2.31       | 2.19   | 2.00   | 2.10    | 2.57        | 3.26   | 3.51   | 3.27    |
| Valeric acid                    | g COD/L                                | -         | -      | -      | -       | -          | -      | -      | -       | -           | -      | -      | -       |
| COD <sub>SOL</sub>              | g COD/L                                | 12.4      | 12.6   | 13.2   | 12.8    | 23.8       | 22.9   | 23.2   | 24.0    | 33.3        | 35.2   | 35.7   | 34.2    |
| Alkalinity                      | g CaCO <sub>3</sub> /L                 | 2.70      | 2.72   | 2.72   | 2.70    | 2.77       | 2.74   | 2.76   | 2.74    | 2.89        | 2.93   | 2.87   | 2.86    |
| N-NH <sub>4</sub> <sup>+</sup>  | mg/L                                   | 880       | 725    | 810    | 741     | 1268       | 1284   | 1218   | 1131    | 1432        | 1569   | 1665   | 1679    |
| P-PO <sub>4</sub> <sup>3-</sup> | mg/L                                   | 2.2       | 2.2    | 2.6    | 2.2     | 2.8        | 2.8    | 2.8    | 2.5     | 2.6         | 2.7    | 2.9    | 2.8     |
| Chromium VI                     | mg/L                                   | < 0.03    | < 0.03 | < 0.03 | < 0.03  | < 0.03     | < 0.03 | < 0.03 | < 0.03  | < 0.03      | < 0.03 | < 0.03 | < 0.03  |
